# Supplementary material
Source: PubMed Central journal article supplement (PMC10362937)
Supplement: web_material_mxac002.pdf [file web_material_mxac002.pdf]

## **Web Material**

### **Closing the Gap Between Observational Research and Randomized Controlled Trials for Prevention of Alzheimer Disease and Dementia**

Melinda C. Power, Brittany Engelman, Jingkai Wei, M. Maria Glymour

#### **Table of Contents**

**Web Table 1.** Overview of Randomized Controlled Trials Testing the Impact of Blood Pressure Lowering Through Antihypertensive Medication Use on Cognition

**Web Table 1.** Overview of Randomized Controlled Trials Testing the Impact of Blood Pressure Lowering Through Antihypertensive Medication Use on Cognition

| <b>Trial</b>              | <b>Target Population</b>                                                                                                                                                                                                                                  | <b>Intervention and Control Conditions</b>                                                                                                                                                                           | <b>Primary Trial Outcome</b>                                                                                                                           | <b>Primary Cognitive Outcome</b>                                             | <b>Primary Cognitive Finding</b>                                                                                                        |
|---------------------------|-----------------------------------------------------------------------------------------------------------------------------------------------------------------------------------------------------------------------------------------------------------|----------------------------------------------------------------------------------------------------------------------------------------------------------------------------------------------------------------------|--------------------------------------------------------------------------------------------------------------------------------------------------------|------------------------------------------------------------------------------|-----------------------------------------------------------------------------------------------------------------------------------------|
| <b>ACCORD-MIND (1, 2)</b> | People with type 2 diabetes mellitus on diabetes therapy for at least 3 months, age 55-79 or age 40-54 with a history of clinical CVD, at high risk for CVD events, SBP 130-180 mmHg <sup>a</sup> , no cognitive impairment or dementia                   | 2 x2 factorial design to (1) active treatment to achieve HbA1C <6.0% or 7.0–7.9%, (2) active treatment to achieve SBP <120 mmHg or <140 mmHg) <sup>a</sup>                                                           | Composite outcome (nonfatal myocardial infarction, nonfatal stroke, cardiovascular death)                                                              | Change in cognitive function (40-month DSST scores)                          | Difference in adjusted 40-month DSST mean scores -0.26 (95%CI -0.11, 0.59), p=0.55                                                      |
| <b>ADVANCE (3)</b>        | People aged 55 and older with type 2 diabetes and a history of major macrovascular or microvascular disease, or at least one other cardiovascular risk factor                                                                                             | 2 x 2 factorial design to (1) perindopril-indapamide vs placebo, (2) intensive glucose control strategy (HbA1C target of 6.5% or less) vs standard glucose control strategy (A1C target defined by local guidelines) | Composite of macrovascular (cardiovascular death, nonfatal MI, nonfatal stroke) and microvascular (new or worsening nephropathy or retinopathy) events | Dementia, cognitive decline (decrease in MMSE score ≥3 points from baseline) | -27% (95%CI -88%, 13%) relative risk reduction for dementia, 2% (95% CI -7%, 11%, p=0.01) relative risk reduction for cognitive decline |
| <b>HOPE-3 (4, 5)</b>      | People aged 70 or older <sup>b</sup> with at least one cardiovascular risk factor (elevated waist-to-hip ratio, low HDLc, tobacco use, dysglycemia, family history of premature coronary disease, mild renal function) but without cardiovascular disease | 2 x 2 factorial design to (1) combination of candesartan and hydrochlorothiazide vs placebo and (2) rosuvastatin vs placebo                                                                                          | Composite 1: death from cardiovascular causes, nonfatal myocardial infarction, nonfatal stroke, Composite 2: Composite 1 or resuscitated cardiac       | Change in cognitive function (DSST score)                                    | Mean difference in DSST score change -0.92 (95% CI -2.55, 0.42)                                                                         |

|                          |                                                                                                                                                                     |                                                                                                                                                                                                                                                                       |                                                                                                            |                                                                                                                                                                                             |                                                                                                                                                                                                                          |
|--------------------------|---------------------------------------------------------------------------------------------------------------------------------------------------------------------|-----------------------------------------------------------------------------------------------------------------------------------------------------------------------------------------------------------------------------------------------------------------------|------------------------------------------------------------------------------------------------------------|---------------------------------------------------------------------------------------------------------------------------------------------------------------------------------------------|--------------------------------------------------------------------------------------------------------------------------------------------------------------------------------------------------------------------------|
|                          | or an indication or contraindication for statins                                                                                                                    |                                                                                                                                                                                                                                                                       | arrest, heart failure, or revascularization                                                                |                                                                                                                                                                                             |                                                                                                                                                                                                                          |
| <b>HYVET-COG (6, 7)</b>  | People ages 80 and older with SBP 160–199 mmHg and DBP <110 mmHg, without diagnosed dementia                                                                        | Active treatment (indapamide with or without perindopril) to a target 150 mmHg SBP and 80 mmHg DBP vs placebo                                                                                                                                                         | Fatal or nonfatal stroke                                                                                   | Dementia                                                                                                                                                                                    | HR: 0.86 (95%CI 0.67, 1.09)                                                                                                                                                                                              |
| <b>MRC (8, 9)</b>        | People ages 65–74 with SBP 160–209 mmHg and DBP <115 mmHg who do not take antihypertensive medication, and do not have heart failure or diabetes.                   | Diuretic vs beta blocker vs placebo, allowing for modifications of active treatment if SBP did not reach target (150 or 160 mm Hg depending on baseline) and initiation of outside-protocol treatment from a GP for those on placebo if SBP<210 mmHg or DBP >115 mmHg | Stroke, coronary events, all-cause mortality                                                               | Change in cognitive function (based on PALT and TMT -A scores)                                                                                                                              | No difference in cognitive change across diuretic, beta blocker, or placebo groups (p=0.33 for TMT-A, p=0.86 for PALT)                                                                                                   |
| <b>ONTARGET (10, 11)</b> | People aged 55 and older with evidence of coronary artery, peripheral vascular, or cerebrovascular disease or diabetes with end-organ damage, without heart failure | Telmisartan, ramipiril, or combination of telmisartan and ramipiril                                                                                                                                                                                                   | Composite outcome (cardiovascular death, myocardial infarction, stroke, hospitalization for heart failure) | Cognitive impairment (confirmed diagnosis of dementia, or MMSE ≤ 23 in those without reported dementia or impairment at baseline), cognitive decline (drop of ≥3 MMSE points from baseline) | Telmisartan vs ramipiril: cognitive impairment OR: 0.90 (95%CI 0.80, 1.01), cognitive decline OR: 0.97 (95%CI 0.98, 1.06)<br><br>Combination vs ramipiril: cognitive impairment – OR: 0.95 (95%CI 0.85, 1.07); cognitive |

|                          |                                                                                                                                                                                                                                                                                        |                                                                                                                                                                                                           |                                                                                                        |                                                                                                                                     |                                                                                                                                                     |
|--------------------------|----------------------------------------------------------------------------------------------------------------------------------------------------------------------------------------------------------------------------------------------------------------------------------------|-----------------------------------------------------------------------------------------------------------------------------------------------------------------------------------------------------------|--------------------------------------------------------------------------------------------------------|-------------------------------------------------------------------------------------------------------------------------------------|-----------------------------------------------------------------------------------------------------------------------------------------------------|
|                          |                                                                                                                                                                                                                                                                                        |                                                                                                                                                                                                           |                                                                                                        |                                                                                                                                     | decline – OR: 0.95 (95%CI 0.88, 1.04)                                                                                                               |
| <b>PROFESS (12, 13)</b>  | People aged 55 or older with ischemic stroke in past 90 days or people aged 50–54 or those with stroke 90-120 days with 2 additional risk factors (diabetes mellitus, hypertension, smoker at time of stroke, obesity, previous vascular disease, end organ damage, or hyperlipidemia) | 2 x 2 factorial design to (1) low-dose aspirin and extended-release dipyridamole vs clopidogrel (2) telmisartan vs placebo on top of existing antihypertensive medication use                             | Recurrent stroke                                                                                       | Significant cognitive decline (decrease in MMSE score $\geq 3$ points from baseline), cognitive impairment (MMSE $\leq 24$ )        | For telmisartan vs placebo, MMSE decrease, RR: 1.01 (95%CI 0.94, 1.09), MMSE $\leq 24$ , RR: 0.95 (95%CI 0.87, 1.05)                                |
| <b>PROGRESS (14, 15)</b> | People with history of stroke or transient ischemic attack within past 5 years                                                                                                                                                                                                         | Active treatment (perindopril with or without indapamide) vs placebo                                                                                                                                      | Fatal and nonfatal stroke                                                                              | Dementia, substantial cognitive decline (decline of $\geq 3$ points between baseline and last recorded MMSE score)                  | 12% (95%CI -8%, 28%, p=0.20) reduction in risk of dementia, 19% (95% CI 4%, 32%, p=0.01) reduction in risk of cognitive decline                     |
| <b>SCOPE (16)</b>        | People between the ages of 70–89 with treated or untreated SBP of 160–179 mmHg and/or DBP of 90–99 mmHg and MMSE score of 24 or greater                                                                                                                                                | Candesartan, allowing for addition of treatment with hydrochlorothiazide in either group if SBP >160 mmHg, DBP >90 or SBP did not drop by at least 10 mmHg from baseline, vs usual treatment plus placebo | Major cardiovascular events (cardiovascular deaths, non-fatal myocardial infarction, non-fatal stroke) | Dementia, significant cognitive decline (reduction of MMSE of 4 points or more at 2 consecutive visits in comparison with baseline) | MMSE score mean difference of 0.15 (95% CI, -0.08 to 0.38), RR for dementia: 1.08 (calculated from reporting of incidence rates), p>0.20 (reported) |
| <b>SHEP (17, 18)</b>     | People ages 60 and older with SBP 160–219 mmHg and DBP                                                                                                                                                                                                                                 | Drug treatment (step 1 chlorthalidone, step 2                                                                                                                                                             | Fatal and nonfatal stroke                                                                              | Cognitive impairment                                                                                                                | No difference in cognitive                                                                                                                          |

|                             |                                                                                                                                                                          |                                                                                                                                                                                            |                                                                                                     |                                                                                                      |                                                                                   |
|-----------------------------|--------------------------------------------------------------------------------------------------------------------------------------------------------------------------|--------------------------------------------------------------------------------------------------------------------------------------------------------------------------------------------|-----------------------------------------------------------------------------------------------------|------------------------------------------------------------------------------------------------------|-----------------------------------------------------------------------------------|
|                             | <90 mmHg if not using or after withdrawal of antihypertensive medication (i.e., isolated systolic hypertension), and absence of other cardiovascular disease or dementia | atenolol or reserpine) with a goal in both arms of a 20 mmHg decrease in SBP in those with baseline SBP 160-179 mmHg and to below 160 mmHg in those with baseline SBP >179 mmHg vs placebo |                                                                                                     |                                                                                                      | impairment across groups                                                          |
| <b>SPRINT-MIND (19, 20)</b> | People aged 50 or older with SPB between 130–180 mmHg with increased cardiovascular risk who do not have dementia, history of stroke, or diabetes                        | Active pharmacologic treatment to achieve SBP of <120 mmHg or <140 mmHg                                                                                                                    | Composite outcome (MI, other acute coronary syndromes, stroke, heart failure, cardiovascular death) | Dementia                                                                                             | HR 0.93 (95% CI 0.73–1.18), excluding extended follow-up                          |
| <b>SPS3 (21, 22)</b>        | People aged ≥30 with lacunar stroke confirmed by MRI within previous 6 months, with modified Rankin score >3 and MMSE score ≥24                                          | 2 x 2 factorial design to (1) aspirin plus placebo vs aspirin plus clopidogrel, (2) active treatment to SBP <130 mmHg vs 130–149 mmHg                                                      | Time to recurrent stroke                                                                            | Cognitive function (as measured by CASI), incident MCI (based on cognitive test battery performance) | No difference in change in CASI (p=0.52), or incident MCI (p=0.55)                |
| <b>SYST-EUR (23, 24)</b>    | People 60 years and older with SBP 160–219 mmHg and DBP <95 mmHg who do not have dementia or congestive heart failure                                                    | Active treatment (nitrendipine, with/replaced by or without enalapril and/or hydrochlorothiazide) to reduce SBP by at least 20 mmHg to below 150 mmHg vs placebo                           | Fatal and nonfatal stroke                                                                           | Dementia                                                                                             | Reduced incidence of dementia from 7.7 to 3.8 cases per 1000 person years, p=0.05 |
| <b>TRANSCEND (10, 25)</b>   | People aged 55 and older with evidence of coronary artery,                                                                                                               | Telmisartan vs placebo                                                                                                                                                                     | Composite outcome (cardiovascular                                                                   | Cognitive impairment                                                                                 | Cognitive impairment OR:                                                          |

|                                                                                                                                                         |                                                                          |                                                                                                                                                                                   |                                                                        |
|---------------------------------------------------------------------------------------------------------------------------------------------------------|--------------------------------------------------------------------------|-----------------------------------------------------------------------------------------------------------------------------------------------------------------------------------|------------------------------------------------------------------------|
| peripheral vascular, or cerebrovascular disease or diabetes with end-organ damage, without heart failure, with history of intolerance to ACE inhibitors | death, myocardial infarction, stroke, hospitalization for heart failure) | (confirmed diagnosis of dementia, or MMSE $\leq$ 23 in those without reported dementia or impairment at baseline), cognitive decline (drop of $\geq$ 3 MMSE points from baseline) | 0.97 (95%CI 0.81, 1.17); cognitive decline OR: 1.10 (95%CI 0.95, 1.27) |
|---------------------------------------------------------------------------------------------------------------------------------------------------------|--------------------------------------------------------------------------|-----------------------------------------------------------------------------------------------------------------------------------------------------------------------------------|------------------------------------------------------------------------|

**Abbreviations:** ACCORD-MIND, Action to Control Cardiovascular Risk in Diabetes – Memory in Diabetes; ADVANCE, Action in Diabetes and Vascular Disease: Preterax and Diamicron Modified Release Controlled Evaluation; CASI, Cognitive Assessment Screening Instrument; CI, confidence interval; CVD, cardiovascular disease; DBP, diastolic blood pressure; DSST, digit-symbol substitution test; GP, general practitioners; HDLc, high density lipoprotein cholesterol; HbA1C, glycated hemoglobin; HOPE-3, Heart Outcomes Prevention Evaluation - 3; HR, hazard ratio; HYVET-COG, Hypertension in the Very Elderly Trial – Cognitive Function Assessment; MMSE, Mini-Mental State Examination; MI, myocardial infarction; MRC, Medical Research Council; ONTARGET, Ongoing Telmisartan Alone and in Combination with Ramipril Global Endpoint Trial; OR, odds ratio; PALT, paired associate learning test; PRoFESS, Prevention Regimen for Effectively Avoiding Second Strokes Trial; PROGRESS, Perindopril Protection Against Recurrent Stroke Study; RR, relative risk; SBP, systolic blood pressure; SCOPE, Study on Cognition and Prognosis in the Elderly; SHEP, Systolic Hypertension in the Elderly Program; SPRINT-MIND, Systolic Blood Pressure Intervention Trial – MIND; SPS-3, Secondary Prevention of Small Subcortical Strokes; SYST-EUR, Systolic Hypertension in Europe; TMT-A, Trail Making Test, Part A; TRANSCEND, Telmisartan Randomized Assessment Study in ACE Intolerant Subjects with Cardiovascular Disease

<sup>a</sup>ACCORD-MIND used a double 2x2 factorial design to HbA1c targets and either SBP targets or fenofibrate vs placebo. We report here only on those who could have been randomized to SBP targets.

<sup>b</sup>Age criterion for the HOPE-3 cognitive sub-study only; HOPE-3 included men ages 55 and older and women ages 65 and older

## References for Web Materials

1. Williamson JD, Launer LJ, Bryan RN, et al. Cognitive function and brain structure in persons with type 2 diabetes mellitus after intensive lowering of blood pressure and lipid levels: a randomized clinical trial. *JAMA Intern Med.* 2014;174(3):324-33.
2. Buse JB, Bigger JT, Byington RP, et al. Action to Control Cardiovascular Risk in Diabetes (ACCORD) trial: design and methods. *Am J Cardiol.* 2007;99(12a):21i-33i.
3. Patel A, MacMahon S, Chalmers J, et al. Intensive blood glucose control and vascular outcomes in patients with type 2 diabetes. *N Engl J Med.* 2008;358(24):2560-72.
4. Bosch J, O'Donnell M, Swaminathan B, et al. Effects of blood pressure and lipid lowering on cognition: Results from the HOPE-3 study. *Neurology.* 2019;92(13):e1435-e46.
5. Yusuf S, Bosch J, Dagenais G, et al. Cholesterol Lowering in Intermediate-Risk Persons without Cardiovascular Disease. *New England Journal of Medicine.* 2016;374(21):2021-31.
6. Peters R, Beckett N, Forette F, et al. Incident dementia and blood pressure lowering in the Hypertension in the Very Elderly Trial cognitive function assessment (HYVET-COG): a double-blind, placebo controlled trial. *Lancet Neurol.* 2008;7(8):683-9.
7. Beckett NS, Peters R, Fletcher AE, et al. Treatment of Hypertension in Patients 80 Years of Age or Older. *New England Journal of Medicine.* 2008;358(18):1887-98.
8. Prince MJ, Bird AS, Blizard RA, et al. Is the cognitive function of older patients affected by antihypertensive treatment? Results from 54 months of the Medical Research Council's trial of hypertension in older adults. *BMJ.* 1996;312(7034):801-5.
9. MRC Working Party. Medical Research Council trial of treatment of hypertension in older adults: principal results. . *Bmj.* 1992;304(6824):405-12.
10. Anderson C, Teo K, Gao P, et al. Renin-angiotensin system blockade and cognitive function in patients at high risk of cardiovascular disease: analysis of data from the ONTARGET and TRANSCEND studies. *Lancet Neurol.* 2011;10(1):43-53.
11. Teo K, Yusuf S, Sleight P, et al. Rationale, design, and baseline characteristics of 2 large, simple, randomized trials evaluating telmisartan, ramipril, and their combination in high-risk patients: the Ongoing Telmisartan Alone and in Combination with Ramipril Global Endpoint Trial/Telmisartan Randomized Assessment Study in ACE Intolerant Subjects with Cardiovascular Disease (ONTARGET/TRANSCEND) trials. *Am Heart J.* 2004;148(1):52-61.
12. Diener HC, Sacco RL, Yusuf S, et al. Effects of aspirin plus extended-release dipyridamole versus clopidogrel and telmisartan on disability and cognitive function after recurrent stroke in patients with ischaemic stroke in the Prevention Regimen for Effectively Avoiding Second Strokes (PROFESS) trial: a double-blind, active and placebo-controlled study. *Lancet Neurol.* 2008;7(10):875-84.
13. Sacco RL, Diener H-C, Yusuf S, et al. Aspirin and Extended-Release Dipyridamole versus Clopidogrel for Recurrent Stroke. *New England Journal of Medicine.* 2008;359(12):1238-51.

14. Tzourio C, Anderson C, Chapman N, et al. Effects of blood pressure lowering with perindopril and indapamide therapy on dementia and cognitive decline in patients with cerebrovascular disease. *Arch Intern Med.* 2003;163(9):1069-75.
15. Tzourio C, Anderson C. Blood pressure reduction and risk of dementia in patients with stroke: rationale of the dementia assessment in PROGRESS (Perindopril Protection Against Recurrent Stroke Study). PROGRESS Management Committee. *J Hypertens Suppl.* 2000;18(1):S21-4.
16. Lithell H, Hansson L, Skoog I, et al. The Study on Cognition and Prognosis in the Elderly (SCOPE): principal results of a randomized double-blind intervention trial. *J Hypertens.* 2003;21(5):875-86.
17. Applegate WB, Pressel S, Wittes J, et al. Impact of the treatment of isolated systolic hypertension on behavioral variables. Results from the systolic hypertension in the elderly program. *Arch Intern Med.* 1994;154(19):2154-60.
18. The Systolic Hypertension in the Elderly Program (SHEP) Cooperative Research Group. Rationale and design of a randomized clinical trial on prevention of stroke in isolated systolic hypertension. *J Clin Epidemiol.* 1988;41(12):1197-208.
19. Group TSMiftSR. Effect of Intensive vs Standard Blood Pressure Control on Probable Dementia: A Randomized Clinical Trial. *JAMA.* 2019;321(6):553-61.
20. The SPRINT Research Group. A Randomized Trial of Intensive versus Standard Blood-Pressure Control. *New England Journal of Medicine.* 2015;373(22):2103-16.
21. Pearce LA, McClure LA, Anderson DC, et al. Effects of long-term blood pressure lowering and dual antiplatelet treatment on cognitive function in patients with recent lacunar stroke: a secondary analysis from the SPS3 randomised trial. *Lancet Neurol.* 2014;13(12):1177-85.
22. Benavente OR, White CL, Pearce L, et al. The Secondary Prevention of Small Subcortical Strokes (SPS3) study. *Int J Stroke.* 2011;6(2):164-75.
23. Forette F, Seux M-L, Staessen JA, et al. Prevention of dementia in randomised double-blind placebo-controlled Systolic Hypertension in Europe (Syst-Eur) trial. *The Lancet.* 1998;352(9137):1347-51.
24. Staessen JA, Fagard R, Thijs L, et al. Randomised double-blind comparison of placebo and active treatment for older patients with isolated systolic hypertension. The Systolic Hypertension in Europe (Syst-Eur) Trial Investigators. *Lancet.* 1997;350(9080):757-64.
25. Yusuf S, Teo K, Anderson C, et al. Effects of the angiotensin-receptor blocker telmisartan on cardiovascular events in high-risk patients intolerant to angiotensin-converting enzyme inhibitors: a randomised controlled trial. *Lancet.* 2008;372(9644):1174-83.
